# Supplementary material
Source: PubMed Central journal article supplement (PMC4079360)
Supplement: supp_tpc.114.125807_tpc125807_SupplementalData.pdf [file supp_tpc.114.125807_tpc125807_SupplementalData.pdf]

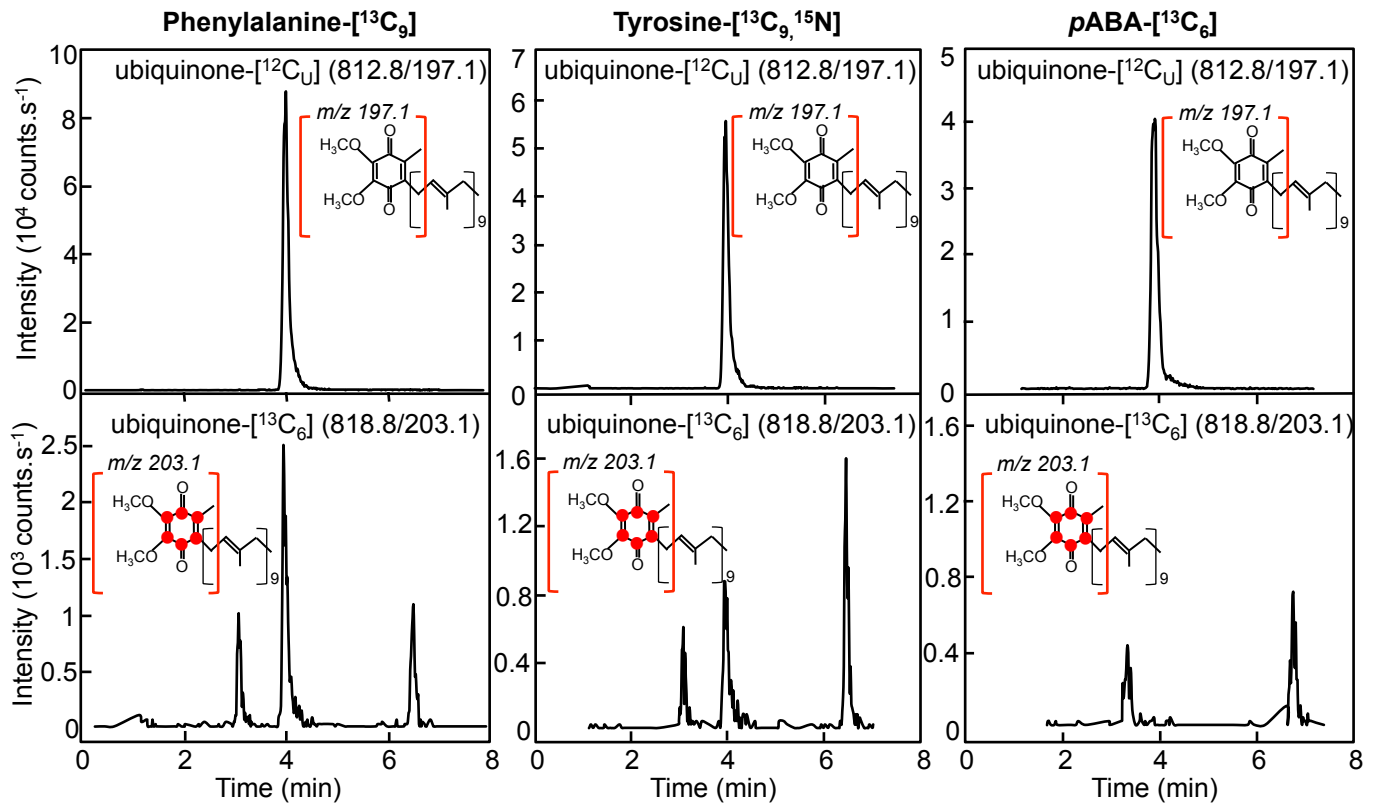

**Supplemental Figure 1.** Extracted counts of ion pairs for multiple reaction monitorings of ubiquinone isotopes. Axenically grown *Arabidopsis* were fed for 3h with 250  $\mu\text{M}$  doses of phenylalanine- $^{13}\text{C}_9$  (left panels), tyrosine- $^{13}\text{C}_9, ^{15}\text{N}$  (center panels) or *p*ABA- $^{13}\text{C}_6$  (right panels). Red dots indicate the positions of the  $^{13}\text{C}$  isotope.

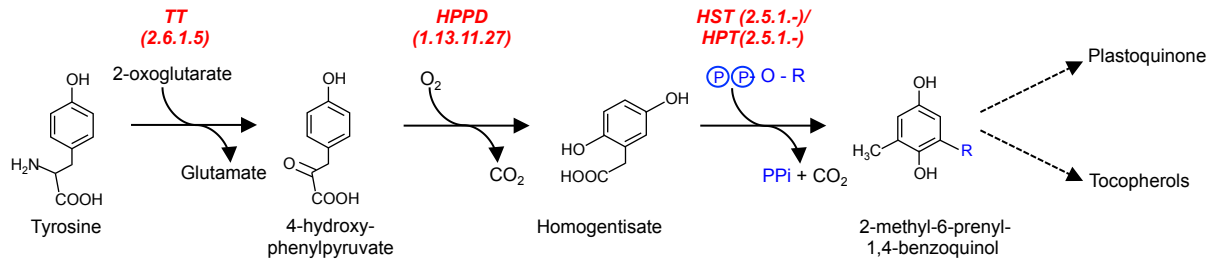

**Supplemental Figure 2.** Formation of the ring of plastid prenyl benzoquinones from tyrosine. R is phytyl ( $C_{20}$ ) in the biosynthetic pathway of tocopherols, and solanesyl ( $C_{45}$ ) in that of plastoquinone. HPPD, 4-hydroxyphenylpyruvate dioxygenase; HPT, homogentisate phytyl transferase; HST, homogentisate solanesyl transferase; TT, tyrosine transaminase

| <b>Supplemental Table 1. CoA ligase activity in Arabidopsis extracts</b> |                                          |                     |          |          |
|--------------------------------------------------------------------------|------------------------------------------|---------------------|----------|----------|
|                                                                          | nmoles.mg <sup>-1</sup> .h <sup>-1</sup> |                     |          |          |
|                                                                          | <i>p</i> -coumarate                      | <i>t</i> -cinnamate | Ferulate | Caffeate |
| Wild type                                                                | 49 ± 18                                  | 12 ± 5              | 31 ± 8   | 48 ± 11  |
| <i>at4g19010</i>                                                         | 54 ± 29                                  | 14 ± 9              | 44 ± 18  | 50 ± 13  |

Arabidopsis leaf extracts (18-36 μg) were assayed with 2.5 mM ATP, 0.5 mM CoA and 100 μM of various hydroxycinnamate derivatives for 30-60 min at 30°C. The formation of the corresponding CoA thioesters was monitored spectrophotometrically as described in the Methods. Data are means of three replicates ± S.E. Wild-type and *at4g19010* knockout (SALK\_043310) values are not significantly different as determined by Fisher's test from an analysis of variance (p>0.3).
